# Supplementary material for: Developmental genetics of color pattern establishment in cats
Source: PubMed Central journal article supplement (PMC8423757; doi:10.1038/s41467-021-25348-2), 2021-09-07
Supplement: 41467_2021_25348_MOESM1_ESM.pdf [file 41467_2021_25348_MOESM1_ESM.pdf]

1 **Supplementary Material for Kaelin, McGowan, and Barsh**

2

Diagrams of  
adult pattern -  
dorsal neck

Topological maps from  
stage 16 100 $\mu$ M serial sections -  
dorsal neck

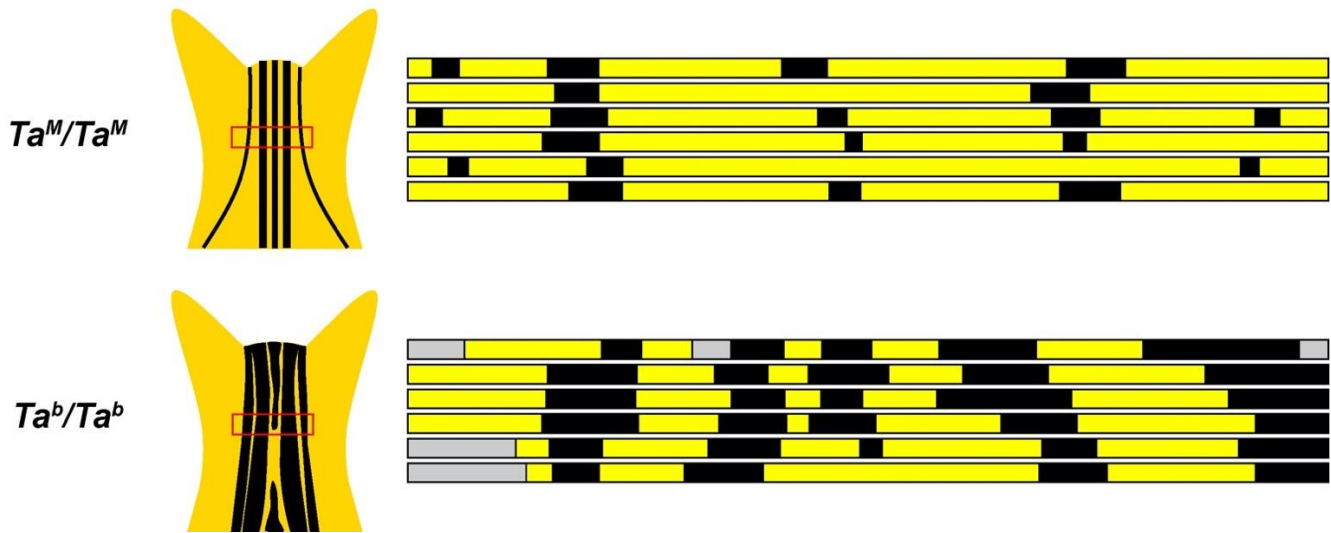

3

4 **Supplementary Fig. 1. Topological maps of dorsal neck skin from Stage 16.**  $Ta^M/Ta^M$  and  $Ta^b/Ta^b$   
5 embryos (thin epidermis, yellow; thick epidermis, black; no data, grey). Each map represents six serial  
6 sections from an embryo of the indicated genotype; thick and thin areas in each section were marked  
7 independently and then aligned to generate a two-dimensional representation of the topology. Cartoons  
8 (left) show adult pigmentation pattern on the dorsal neck (red box indicates anatomic location of map).

9

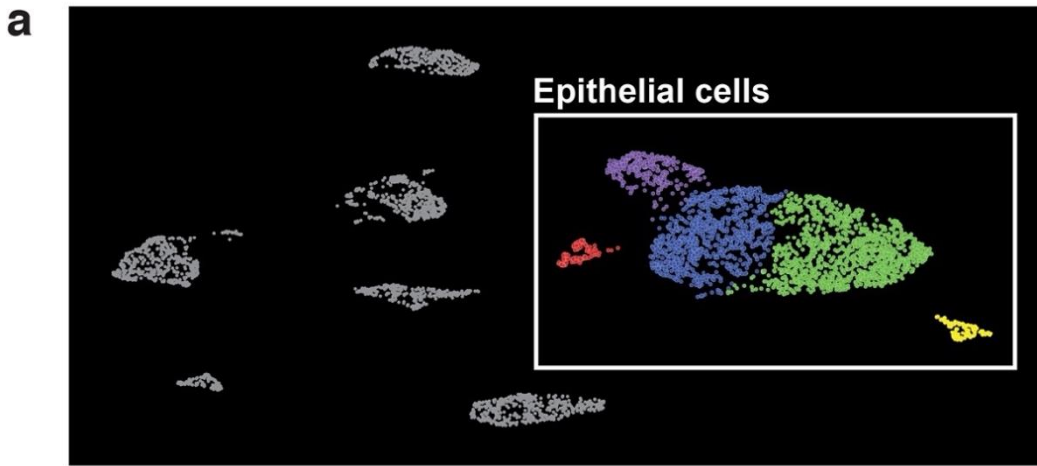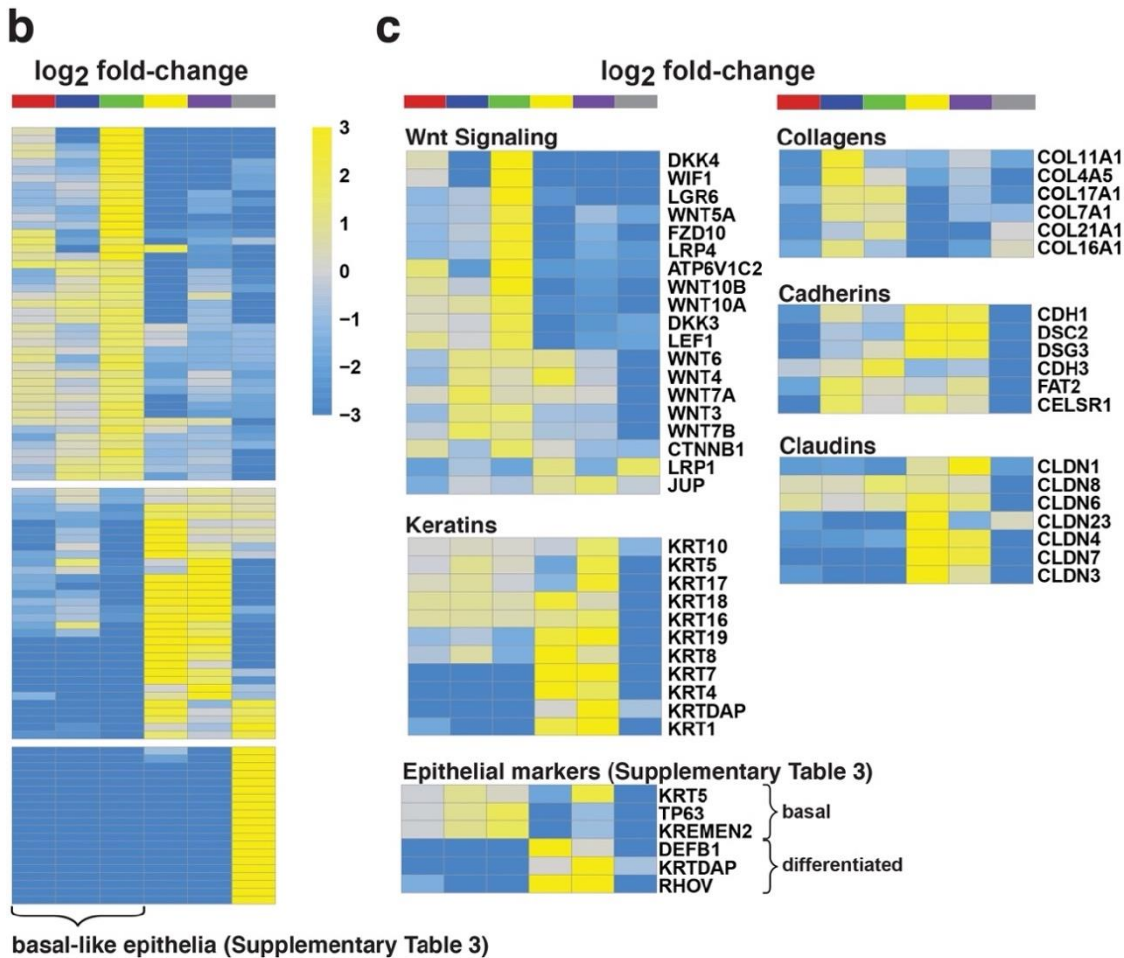

10

11 **Supplementary Figure 2. Patterns of gene expression in different cell types at stage 16a.** (a) Cell  
 12 populations defined by *k*-means clustering (at *k*=10) represent spatially distinct UMAP clusters (except  
 13 for the basal keratinocyte subpopulations, whose defining characteristics are described in the text). (b)  
 14 To characterize the different epithelial cell populations, the top 20 upregulated genes in each population  
 15 were selected, and the log<sub>2</sub>-fold change in expression relative to the mean expression across all cells  
 16 was used to cluster the union of these genes (*n*=97) and cell populations using the pheatmap (v1.012)  
 17 R package and Ward's method. Non-epithelial cell populations are included in all analyses but are

18 considered as a single group, indicated in grey. This approach identifies three major population groups:  
19 basal-like epithelia (red, blue, green), non-basal epithelia (yellow, purple), and non-epithelial cells  
20 (grey), and corresponding sets of genes that define those groups. **(c)** Expression patterns in the  
21 different populations for individual genes in six different gene families. Differentially expressed genes  
22 were filtered for inclusion in heat maps by significance (FDR  $q$ -value  $< 0.05$ ) and expression level  
23 (normalized mean expression  $> 0.25$  transcripts/cell).

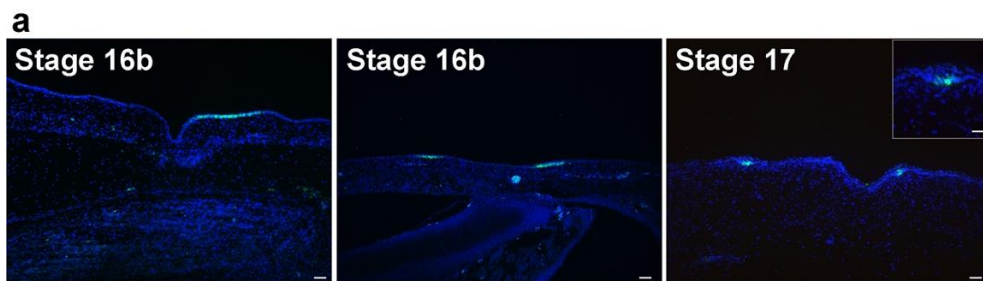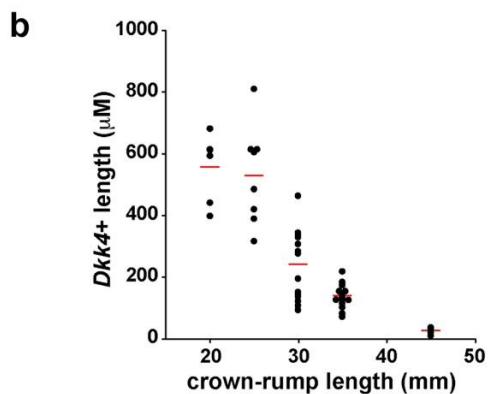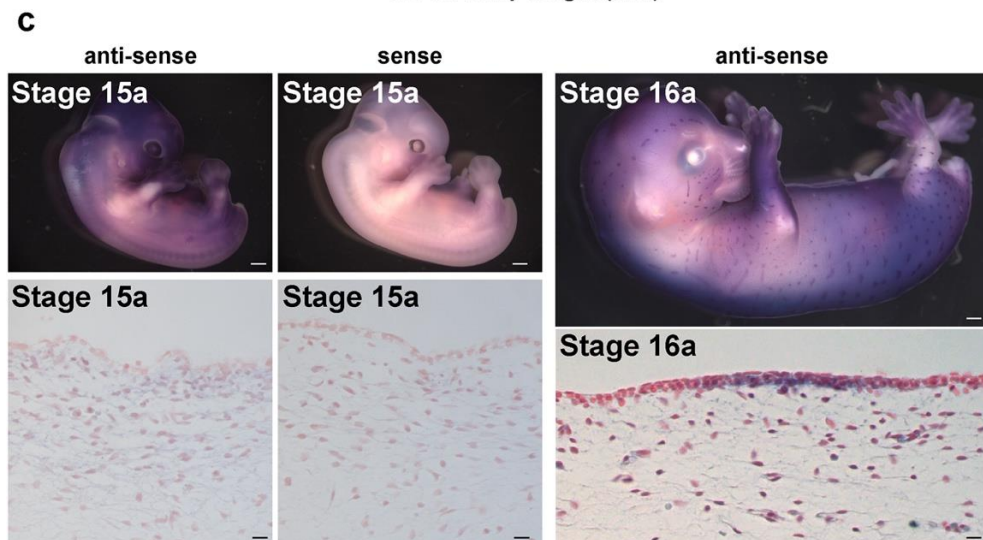

24

25 **Supplementary Fig. 3. *Dkk4* expression in embryonic cat skin.** (a) *Dkk4* expression (green) in  
 26 sections of embryonic cat skin (DAPI, blue). 1-3 *Dkk4*-positive cells are found in sections of developing  
 27 hair buds at stage 17 (right panel, inset). Observations were made independently on three or more  
 28 *Ta<sup>M/-</sup>*- embryos from each developmental stage with similar results. (b) Length of *Dkk4*-positive regions  
 29 from sections of embryonic skin at different developmental time points (crown-rump length is a  
 30 surrogate for stage of embryonic development, Supplementary Table 1; length of 6-16 *Dkk4*-positive  
 31 regions measured from at least three sections at each developmental time point, red bar denotes  
 32 mean). (c) *Dkk4* expression (purple) in stage 15a and stage 16a embryos (top panels; sense control  
 33 probe does not stain embryo). *In situ* hybridizations were carried out independently on four *Ta<sup>M/-</sup>*-  
 34 embryos at each stage. Sections of skin (bottom panels) from embryos shown in top panels are stained  
 35 with nuclear fast red. Scale bars: a, 50 μM; b inset, 25 μM; c top panels, 1mm; c bottom panels 25 μM.

**a** >2-fold increased expression  
in *Dkk4*+ basal cells

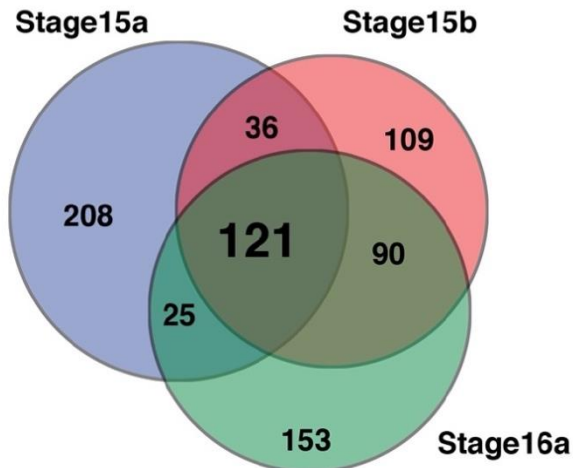

**b** >2-fold decreased expression  
in *Dkk4*+ basal cells

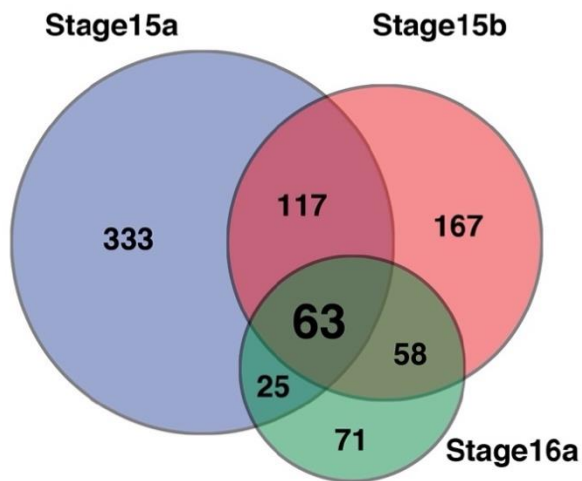

**c**

| Gene            | Fold-increase at stage: |      |      | Transcripts per cell: |      |      | Stage 16a<br>q-value |
|-----------------|-------------------------|------|------|-----------------------|------|------|----------------------|
|                 | 15a                     | 15b  | 16a  | 15a                   | 15b  | 16a  |                      |
| <i>Dkk4</i>     | 504                     | 436  | 17.7 | 22.3                  | 99.2 | 35.6 | 6.8 e-42             |
| <i>Wif1</i>     | 18.2                    | 72.8 | 27.6 | 0.05                  | 0.34 | 2.22 | 4.3 e-43             |
| <i>Dkk3</i>     | 0.67                    | 3.96 | 1.80 | 0.54                  | 1.14 | 0.85 | 4.8 e-3              |
| <i>Atp6v1c2</i> | 9.42                    | 31.6 | 8.34 | 0.31                  | 1.51 | 1.32 | 1.4 e-21             |
| <i>Lgr6</i>     | 3.13                    | 5.93 | 3.89 | 0.79                  | 0.83 | 0.84 | 1.2 e-8              |
| <i>Lrp4</i>     | 3.22                    | 3.15 | 3.92 | 2.41                  | 3.03 | 2.56 | 8.2 e-10             |
| <i>Fzd10</i>    | 3.63                    | 2.58 | 3.29 | 2.58                  | 4.12 | 1.86 | 2.2 e-7              |
| <i>Lef1</i>     | 3.31                    | 2.03 | 2.21 | 3.09                  | 4.82 | 2.83 | 0.0062               |
| <i>Wnt10b</i>   | 1.80                    | 1.51 | 3.27 | 9.06                  | 9.88 | 3.11 | 1.8 e-7              |
| <i>Wnt5a</i>    | 2.18                    | 1.53 | 2.89 | 1.32                  | 0.91 | 0.59 | 6.4 e-5              |
| <i>Ctnnb1</i>   | 1.75                    | 2.93 | 2.92 | 13.3                  | 20.4 | 10.9 | 2.9 e-6              |

36

37 **Supplementary Figure 4. Relationship between differentially expressed genes during fetal skin**  
 38 **development highlights components of Wnt signaling.** The gene list used for the analysis depicted  
 39 here is more sensitive and less stringent than that depicted in Fig. 3 (Methods). Overlap of gene  
 40 expression profiles for genes with >2-fold increased (**a**) or decreased (**b**) expression in *Dkk4*-positive  
 41 basal keratinocytes at stages 15a (blue), 15b (red), and 16a (green). (**c**) Gene expression metrics for  
 42 Wnt signaling genes with elevated expression in *Dkk4*-positive basal keratinocytes; q-values indicate  
 43 the significance of differential expression between basal keratinocyte subpopulations at stage 16a  
 44 (negative binomial exact test). Complete expression data is provided in Supplementary Data 1. Genes  
 45 are colored according to their predicted role in either short-range activation (blue) or long-range  
 46 inhibition (red) of Wnt signaling in thick and thin epidermis, respectively, as presented in a model for  
 47 color pattern establishment in Fig. 3d.

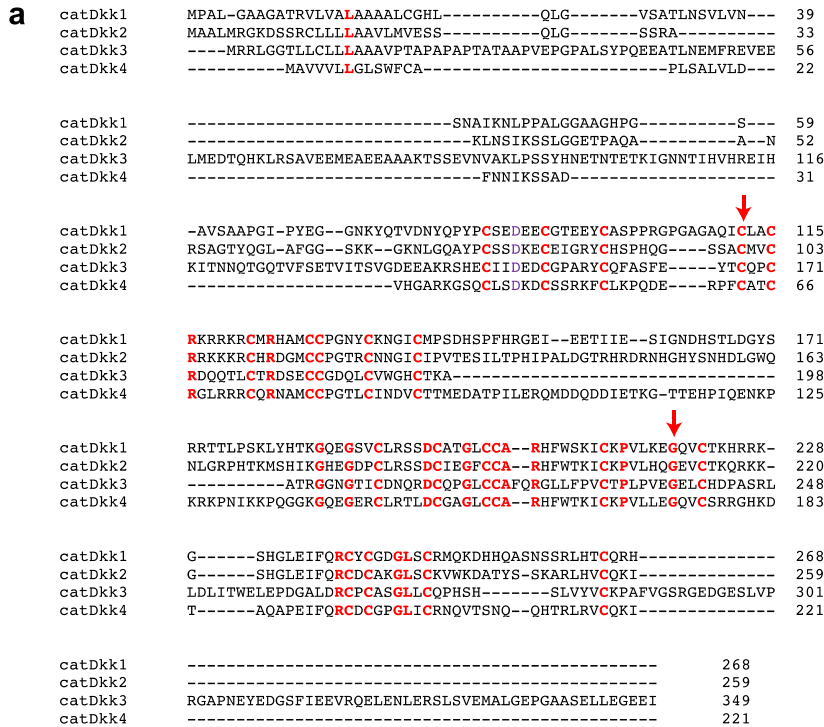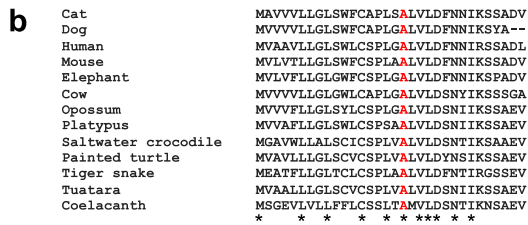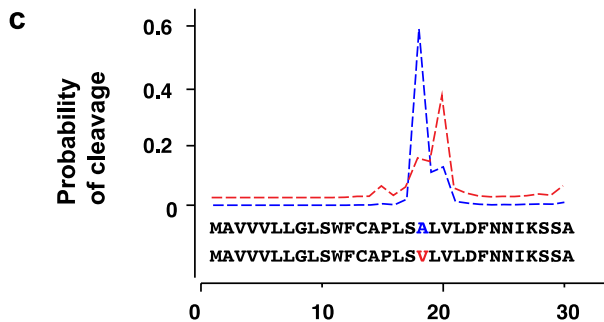

48

49 **Supplementary Fig. 5. Evolutionary constraint and functional prediction for cat *Dkk4* variants**  
50 **associated with *Ticked*.** (a) A protein alignment of cat *Dkk* paralogs, with conserved residues colored  
51 red, and arrows highlighting the position of one of the cat *Dkk4* mutations (p.Cys63Tyr) and the position  
52 of the potentially deleterious residue in tiger (p.Gly173Glu). (b) Vertebrate *Dkk4* alignment with the  
53 residue that harbors the other cat *Dkk4* mutation (p.Ala18Val) colored red. (c) Signal peptide cleavage  
54 site efficiencies predicted by SignalP5.0 for p.Ala18 (blue) and p.Val18 (red) variants.

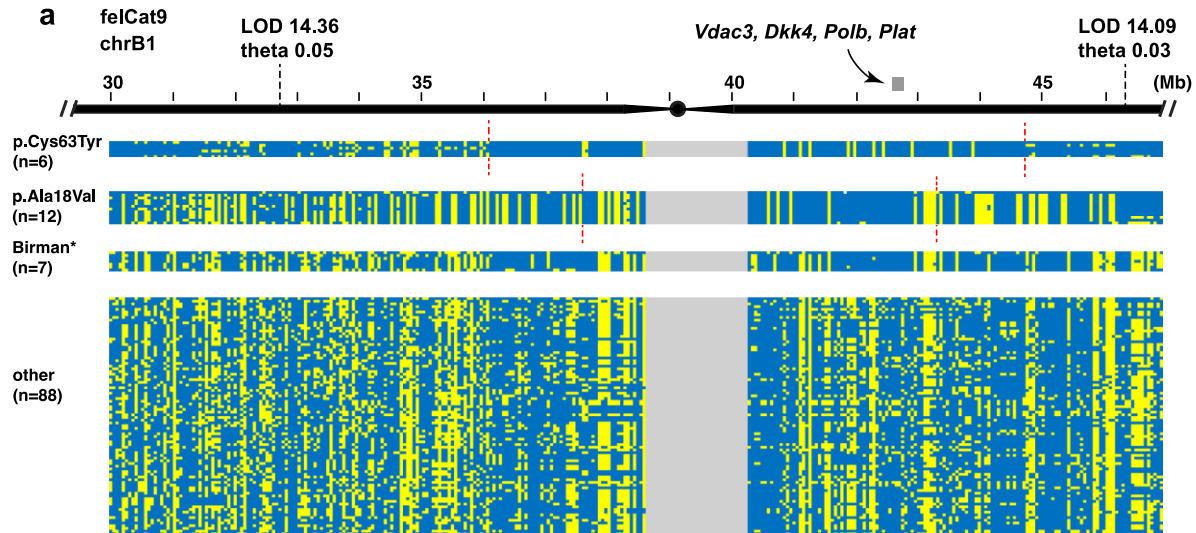

**b** Oriental Short Hair breed (Ticked and non-Ticked)

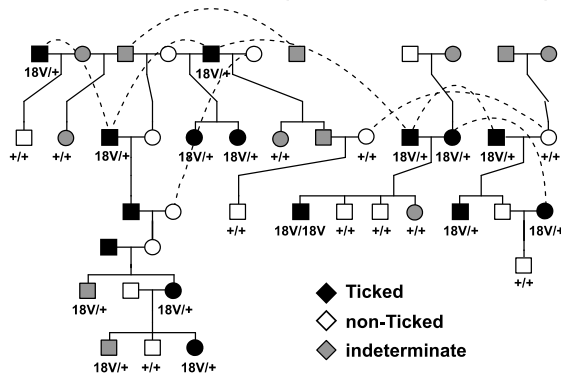

**c** Singapura breed (all Ticked)

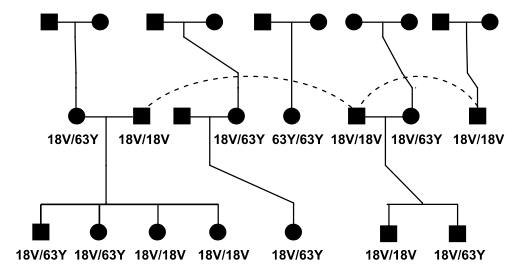

55

56 **Supplementary Fig. 6. *Dkk4* variants occur on extended haplotypes and co-segregate with**  
 57 ***Ticked* in pedigrees.** (a) Haplotypes (rows) were inferred using Beagle (v4.1) for 57 cats in the 99  
 58 Lives data set, with SNPs (columns) indicated as reference (blue) or alternate (yellow) alleles. Broken  
 59 black and red lines delineate the *Ticked* linkage interval and inferred ancestral recombination  
 60 breakpoints on *Ticked* haplotypes, respectively. The grey bar indicates a region containing four genes  
 61 that are differentially expressed between stage 16a basal keratinocyte subpopulations. The Birman\*  
 62 haplotype group consists of Birman (n=5), Devon Rex (n=1), and Domestic Short Hair (n=1)  
 63 haplotypes, which are similar to the shared p.Ala18Val haplotype but do not carry the p.Ala18Val allele.  
 64 (b) An Oriental Shorthair pedigree, demonstrating cosegregation of the Ticked pattern and the  
 65 p.Ala18Val allele. (c) A Singapura pedigree, demonstrating fixation of the Ticked pattern as a  
 66 consequence of p.Ala18Val and p.Cys63Tyr segregation.





71 **Supplementary Table 1. Stages of embryonic and fetal development in the domestic cat.**

| Prenatal stage (cat) <sup>a, b</sup> | Days post-coitus <sup>a</sup> | Crown-rump length (mm) <sup>b</sup> | Prenatal stage (mouse) <sup>c</sup> | Anatomic features (cat) <sup>a, b</sup> | Histologic features (cat) <sup>b</sup> | Molecular features (cat) <sup>b</sup>      |
|--------------------------------------|-------------------------------|-------------------------------------|-------------------------------------|-----------------------------------------|----------------------------------------|--------------------------------------------|
| 13                                   | 19-21                         | 8-11                                | E11                                 |                                         | monolayer of epidermal cells           |                                            |
| 14                                   | 21-23                         | 11-15                               | E12                                 |                                         |                                        |                                            |
| 15a                                  | 23-25 <sup>a, b</sup>         | 15-17                               | E13                                 | finger web resorption                   |                                        |                                            |
| 15b                                  | 23-25 <sup>a, b</sup>         | 18-21                               | E14                                 | toe web resorption                      |                                        | <i>Dkk4</i> -positive domains in epidermis |
| 16a                                  | 25-28 <sup>a, b</sup>         | 22-26                               | E15                                 | eye lid closure begins                  | “thick” epidermal domains              | <i>Dkk4</i> -positive “thick” domains      |
| 16b                                  | 25-28 <sup>a, b</sup>         | 27-37                               | E15                                 |                                         |                                        | Krt10-positive cells in “thick” domains    |
| 17                                   | 28-32                         | 38-47                               | E16                                 | eyelid closure complete                 | hair follicle buds and pegs            | <i>Dkk4</i> -positive cells in hair buds   |
| 18                                   | 32-38                         | 48-60                               |                                     |                                         | epidermis uniform thickness            | Krt10 uniformly expressed in epidermis     |
| 19                                   | 38-44                         | 61-80                               | E17                                 |                                         |                                        |                                            |
| 20                                   | 44-48                         | 81-90                               |                                     |                                         |                                        |                                            |
| 21                                   | 48-60                         | 91-109                              |                                     | hair eruption; pigment pattern visible  | pigmented hair bulbs                   |                                            |
| 22                                   | 60-66                         | 110-130                             | P4-6                                |                                         |                                        |                                            |

72 <sup>a</sup> Based on Knospe et al. <sup>1</sup>  
 73 <sup>b</sup> Based on data reported here  
 74 <sup>c</sup> Based on Kaufman et al. <sup>2</sup>

75  
 76  
 77  
 78

79  
80

**Supplementary Table 2. Histologic and molecular features of thick epidermal domains in cat as compared to developing hair follicle placodes and “normal” epidermal stratification.**

|                                   | <b>“Thick”<br/>epidermal domain<br/>(cat<sup>a</sup>)</b>                                                   | <b>Hair follicle<br/>placode<br/>(mouse, cat<sup>a</sup>)</b>                                                                                                                       | <b>Developing<br/>epidermis<br/>(mouse, cat<sup>a</sup>)</b>                                                                                                                                                        |
|-----------------------------------|-------------------------------------------------------------------------------------------------------------|-------------------------------------------------------------------------------------------------------------------------------------------------------------------------------------|---------------------------------------------------------------------------------------------------------------------------------------------------------------------------------------------------------------------|
| <b>Tissue organization</b>        | 3-5 layers of uniformly spaced, basaloid cells                                                              | Single layer of crowded, basal cells below second layer of basal-like cells, intermediate cell layer and periderm <sup>3*</sup>                                                     | Single layer of uniformly spaced basal cells below intermediate cell layer and periderm <sup>4</sup> ; intermediate cell layer differentiates into spinous, granular, cornified layers; periderm sheds <sup>4</sup> |
| <b>Cellular morphology</b>        | Round, basaloid cells uniformly spaced                                                                      | Vertically polarized, basal cells undergo compaction <sup>3,5</sup> ; round, basaloid and intermediate cells                                                                        | Round, basal and intermediate cells uniformly spaced <sup>4</sup> ; differentiated epidermal cells flatten                                                                                                          |
| <b>Domain width</b>               | 50-500 μM (~20-200 cells); <i>Ta<sup>b</sup>/Ta<sup>b</sup> &gt; Ta<sup>M</sup>/-</i>                       | ~50 μM (~5-20 cells) <sup>3</sup>                                                                                                                                                   |                                                                                                                                                                                                                     |
| <b>Domain depth</b>               | No invagination into dermis                                                                                 | Invaginates into dermis <sup>3*</sup>                                                                                                                                               |                                                                                                                                                                                                                     |
| <b>Proliferation</b>              | Basal and supra-basal cells proliferate (31% Ki67-positive)                                                 | Small fraction proliferating cells (~8%, thickening due to cell migration) <sup>5</sup> ; basal cells proliferate; supra-basal cells proliferate during invagination <sup>5,6</sup> | Basal and few supra-basal cells located just above the basal cell layer proliferate <sup>4,7</sup>                                                                                                                  |
| <b>Keratin expression pattern</b> | Krt5-positive basal and supra-basal cells; Krt10-positive cells lie above 3-5 layers of Krt5-positive cells | Krt5-positive basal and basaloid cells; Krt10-positive intermediate cell layer; Krt8/18-positive periderm <sup>4</sup>                                                              | Krt5-positive basal cells <sup>4</sup> ; Krt1/10-positive supra-basal cells <sup>4,7</sup> ; Krt8/18-positive periderm <sup>4</sup>                                                                                 |
| <b>Dermal cell arrangement</b>    | Dermal cells evenly distributed                                                                             | Dermal cells cluster below placode <sup>3</sup>                                                                                                                                     | Dermal cells evenly distributed                                                                                                                                                                                     |

81  
82  
83

<sup>a</sup>Data in cat from this study.

84 **Supplementary Table 3. Gene markers used for identification of UMAP clusters.**

| <b>Cell population</b>         | <b>Key genes</b>           | <b>Reference</b> |
|--------------------------------|----------------------------|------------------|
| Macrophage/dendritic cells     | <i>Cd163, C1qa, Cd14</i>   | 8,9              |
| Neural Crest                   | <i>Fabp7, Sox10, Foxd3</i> | 10               |
| Stratified epithelium/periderm | <i>Krt5, Rho, Defb1</i>    | 11               |
| Basal keratinocytes            | <i>Krt5, Tp63, Kremen2</i> | 12               |
| Dermal fibroblasts             | <i>Lum, Twist1, Twist2</i> | 12               |
| Myoblasts                      | <i>Myf5, Myod1, Msc</i>    | 13,14            |
| Endothelium                    | <i>Pecam1, Cdh5, Tie1</i>  | 15               |
| Vascular endothelium           | <i>Cd34, Esam, Fam198b</i> | 16               |
| Lymphatic endothelium          | <i>Ccl21, Mmrn1, Igf1</i>  | 17               |

85

86

87 **Supplementary Table 4. scRNAseq summary statistics.**

|                            | Embryonic stage |             |             |
|----------------------------|-----------------|-------------|-------------|
|                            | 15a             | 15b         | 16a         |
| ID                         | C16             | C14         | C64         |
| 10x Genomics Chemistry     | v3              | v3          | v2          |
| Total reads                | 455,308,860     | 450,083,295 | 404,331,199 |
| % mapped to genome         | 87.9            | 87.3        | 87.9        |
| % mapped to transcriptome  | 58.9            | 60.1        | 63.5        |
| Estimated cell count       | 5,493           | 4,454       | 4,617       |
| Mean reads per cell        | 82,889          | 101,051     | 87,574      |
| Median genes per cell      | 4,119           | 4,180       | 2,570       |
| Median UMI per cell        | 18,244          | 17,966      | 9,419       |
| Total genes detected       | 25,514          | 25,222      | 24,164      |
| Estimated cell number      | 5,493           | 4,454       | 4,617       |
| Keratinocyte cell number   | 1,791           | 2,425       | 2,515       |
| Keratinocyte cell fraction | 0.33            | 0.54        | 0.54        |

88  
89

90 **Supplementary Table 5. *Dkk4* coding variants detected in 57 cats<sup>a</sup>.**

| felCat9 coordinate | cDNA variant <sup>b</sup> | Amino acid variant <sup>b</sup> | Allele freq (n=57) <sup>c</sup> | Abyssinian allele freq (n=4) <sup>c</sup> | CADD phred        |
|--------------------|---------------------------|---------------------------------|---------------------------------|-------------------------------------------|-------------------|
| chrB1:42620835     | c41t                      | A18V                            | 0.10                            | 0.13                                      | 22.9              |
| chrB1:42621481     | g188a                     | C63Y                            | 0.05                            | 0.75                                      | 21.4              |
| chrB1:42621505     | g212a                     | R71K                            | 0.14                            | 0.75                                      | 5.8               |
| chrB1:42621551     | a258g                     | I86M                            | 0.01                            | 0                                         | 0.3 <sup>d</sup>  |
| chrB1:42622162     | a395g                     | K132R                           | 0.12                            | 0                                         | 14.2              |
| chrB1:42623424     | t602c                     | I201T                           | 0.66                            | 0.13                                      | 16.0 <sup>e</sup> |
| chrB1:42623444     | a622g                     | S208G                           | 0.01                            | 0                                         | 0.2               |
| chrB1:42623455     | a633c                     | Q211H                           | 0.01                            | 0                                         | 0.2 <sup>d</sup>  |

91 <sup>a</sup> All variants predicted to alter amino acids in *Dkk4* are shown. In 57 cat genome sequences from the 99 Lives collection,  
 92 there are an additional 3 variants in *Dkk4* that are synonymous, and with CADD scores of  $Q < 10$ . No variants predicted to alter  
 93 amino acids were identified in Abyssinians for the 3 other genes that are differentially expressed and overlap with the *Ticked*  
 94 linkage interval, *Plat*, *Polb*, and *Vdac3*.

95 <sup>b</sup> Ancestral allele is shown as the reference allele.

96 <sup>c</sup> Allele frequencies for the derived allele.

97 <sup>d</sup> Reference base between cat and human differs.

98 <sup>e</sup> Adjacent nucleotide position differs between cat and human, affecting the reference alternate codon, making CADD score  
 99 interpretation unreliable.

**Supplementary Table 6. *Dkk4* alleles categorized according to breed and phenotype<sup>a</sup>.**

| Breed and phenotype                    | <i>Dkk4</i> genotype |       |       |         |         |         | Total           |
|----------------------------------------|----------------------|-------|-------|---------|---------|---------|-----------------|
|                                        | +/+                  | +/18V | +/63Y | 18V/18V | 18V/63Y | 63Y/63Y |                 |
| Abyssinian (Ticked)                    | 0                    | 0     | 1     | 0       | 2       | 34      | 37              |
| Singapura (Ticked)                     | 0                    | 1     | 1     | 4       | 16      | 4       | 26              |
| Burmese (Ticked)                       | 1                    | 1     | 0     | 11      | 0       | 0       | 13              |
| Mau (non-Ticked)                       | 8                    | 0     | 0     | 0       | 0       | 0       | 8               |
| Ocicat (non-Ticked)                    | 13                   | 0     | 0     | 0       | 0       | 0       | 13              |
| Bengal (non-Ticked)                    | 10 <sup>b</sup>      | 0     | 0     | 0       | 0       | 0       | 10 <sup>b</sup> |
| OSH and OLH Ticked                     | 0                    | 23    | 0     | 2       | 0       | 0       | 25              |
| OSH and OLH non-Ticked                 | 21                   | 0     | 0     | 0       | 0       | 0       | 21              |
| Non-breed cats Ticked <sup>c</sup>     | 0                    | 4     | 0     | 0       | 0       | 0       | 4               |
| Non-breed cats non-Ticked <sup>c</sup> | 182                  | 0     | 0     | 0       | 0       | 0       | 182             |

102

<sup>a</sup> The p.Ala18Val and p.Cys63Tyr variants are indicated as 18V and 63Y, respectively. The table includes data from 18 breed cats in the 99Lives dataset (4 Abyssinian, 3 Egyptian Mau, 1 Ocicat, 5 Bengal, 5 Burmese), for which photographs were not available, and for which phenotype was inferred based on breed identity; all other data is based on samples that we ascertained and collected. Of the Oriental Shorthair (OSH) and Oriental Longhair (OLH), 15 had an indeterminate phenotype for which we could not infer *Ticked* genotype, and one was excluded due to an inconsistency in Mendelian transmission.

103

104

105

106

107

<sup>b</sup> Data shown are from targeted genotyping or high-coverage WGS. In additional data from low-coverage (0.1x – 0.5x) WGS on 526 Bengal cats, neither *Dkk4* variant was observed.

108

109

<sup>c</sup> Variation in other coat color genes that masks tabby pattern (as in a Siamese or non-agouti cat) can make it difficult to assess Ticked, and 6 non-breed cats were excluded from this table because their tabby pattern (or lack thereof) could not be determined.

110

111

112 **Supplementary Table 7. *Dkk4* variants and predicted impact (CADD) in the Felidae.**

| Position <sup>a</sup> | Ref | Alt | Amino acid | Species                                                      | CADD  |
|-----------------------|-----|-----|------------|--------------------------------------------------------------|-------|
| 42377041              | A   | G   | p.A2V      | Tigrina                                                      | 3.393 |
| 42377033              | C   | A   | p.V5F      | Puma, Jaguarundi, Cheetah                                    | 0.736 |
| 42376989              | C   | G   | p.D58E     | Fishing cat                                                  | 14.5  |
| 42377012              | G   | A   | p.F12L     | Tiger                                                        | 10.88 |
| 42376955              | C   | T   | p.D31N     | Cheetah                                                      | 14.02 |
| 42376947              | A   | G   | p.H32Q     | Tiger                                                        | 0.68  |
| 42376946              | C   | T   | p.G33R     | Cheetah                                                      | 10.84 |
| 42376939              | C   | T   | p.R35Q     | Puma, Jaguarundi, Cheetah                                    | 9.835 |
| 42375756              | G   | T   | p.F62L     | Cheetah                                                      | 11.17 |
| 42375733              | C   | T   | p.R70Q     | Jaguar                                                       | 1.566 |
| 42375694              | G   | A   | p.T83I     | Cheetah                                                      | 8.476 |
| 42374918              | G   | T   | p.M86I     | Domestic cat, Sand cat, Black-footed cat, Jungle cat         | 4.527 |
| 42374902              | T   | C   | p.T92A     | Puma, Jaguarundi, Cheetah, Bay cat, Asian gold., Marbled cat | 0.571 |
| 42374889              | G   | C   | p.A96G     | Jaguarundi                                                   | 4.66  |
| 42374887              | T   | C   | p.T97A     | Serval                                                       | 0.771 |
| 42374845              | G   | T   | p.E111K    | Flat-headed cat                                              | 0.108 |
| 42374769              | C   | T   | p.G136D    | Puma, Jaguarundi, Cheetah                                    | 3.221 |
| 42374318              | G   | C   | p.A153S    | Flat-headed cat                                              | 10.67 |
| 42374257              | C   | T   | p.G173E    | Tiger                                                        | 26.9  |
| 42374174              | G   | T   | p.I201V    | Geoffroys cat, Tigrina                                       | 2.552 |
| 42374153              | T   | C   | p.G208S    | Domestic cat, Sand cat, Puma                                 | 0.21  |
| 42374114              | T   | C   | p.I221V    | Bay cat                                                      | 0.435 |
| 42374114              | T   | TT  | p.I221fsX4 | Lion                                                         | 19.07 |

113 <sup>a</sup> Genomic coordinates from chromosome B1, felCat9 assembly

114



115 **Supplementary Table 8. Oligonucleotide primers for genotyping *Taqpep* and *Dkk4* variation.**

| Variant                 | Primer                                        |
|-------------------------|-----------------------------------------------|
| <i>Taqpep</i> p.Trp841X | GCCTTCGGAAGTGATGAAGA<br>ACTTCAGATTCCGCCACAAC  |
| <i>Dkk4</i> p.Ala18Val  | GAGCTGAGAAGGTCAAGGTGA<br>GTGGGTACTTGTGCCATTCC |
| <i>Dkk4</i> p.Cys63Try  | CCACTGTGATTTGGCTTCCT<br>CAGTCCCACAGGGGTTTATG  |

116

117

118  
119

**Supplementary Table 9. Basal keratinocyte subpopulation cell number at different *Dkk4* expression thresholds.**

| Stage | Subpopulation            | Expression Threshold |        |        |         |
|-------|--------------------------|----------------------|--------|--------|---------|
|       |                          | 2-fold               | 4-fold | 8-fold | 16-fold |
| 15a   | <i>Dkk4</i> <sup>-</sup> | 1641                 | 1569   | 1670   | 1682    |
| 15a   | <i>Dkk4</i> <sup>+</sup> | 77                   | 59     | 48     | 36      |
| 15b   | <i>Dkk4</i> <sup>-</sup> | 824                  | 865    | 916    | 980     |
| 15b   | <i>Dkk4</i> <sup>+</sup> | 758                  | 717    | 666    | 602     |
| 16a   | <i>Dkk4</i> <sup>-</sup> | 846                  | 931    | 1018   | 1193    |
| 16a   | <i>Dkk4</i> <sup>+</sup> | 1216                 | 1131   | 1044   | 869     |

120  
121

- 122 1. Knospe, C. Periods and Stages of the Prenatal Development of the Domestic Cat. *Anatomia,*  
123 *Histologia, Embryologia: Journal of Veterinary Medicine Series C* **31**, 37-51 (2002).
- 124 2. Kaufman, M. H. *The Atlas of Mouse Development* (Academic Press, 1992).
- 125 3. Paus, R. et al. A comprehensive guide for the recognition and classification of distinct stages of  
126 hair follicle morphogenesis. *J Invest Dermatol* **113**, 523-532 (1999).
- 127 4. Koster, M. I. & Roop, D. R. Mechanisms regulating epithelial stratification. *Annu Rev Cell Dev Biol*  
128 **23**, 93-113 (2007).
- 129 5. Ahtiainen, L. et al. Directional cell migration, but not proliferation, drives hair placode  
130 morphogenesis. *Dev Cell* **28**, 588-602 (2014).
- 131 6. Schmidt-Ullrich, R. et al. NF-kappaB transmits Eda A1/EdaR signalling to activate Shh and cyclin  
132 D1 expression, and controls post-initiation hair placode down growth. *Development* **133**, 1045-  
133 1057 (2006).
- 134 7. Lechler, T. & Fuchs, E. Asymmetric cell divisions promote stratification and differentiation of  
135 mammalian skin. *Nature* **437**, 275-280 (2005).
- 136 8. Murray, P. J. & Wynn, T. A. Protective and pathogenic functions of macrophage subsets. *Nat Rev*  
137 *Immunol* **11**, 723-737 (2011).
- 138 9. Shih, B. B. et al. Derivation of marker gene signatures from human skin and their use in the  
139 interpretation of the transcriptional changes associated with dermatological disorders. *J Pathol*  
140 **241**, 600-613 (2017).
- 141 10. Simões-Costa, M., Stone, M. & Bronner, M. E. Axud1 Integrates Wnt Signaling and  
142 Transcriptional Inputs to Drive Neural Crest Formation. *Dev Cell* **34**, 544-554 (2015).
- 143 11. Joost, S. et al. Single-Cell Transcriptomics Reveals that Differentiation and Spatial Signatures  
144 Shape Epidermal and Hair Follicle Heterogeneity. *Cell Syst* **3**, 221-237.e9 (2016).
- 145 12. Sennett, R. et al. An Integrated Transcriptome Atlas of Embryonic Hair Follicle Progenitors, Their  
146 Niche, and the Developing Skin. *Dev Cell* **34**, 577-591 (2015).
- 147 13. Chal, J. & Pourquié, O. Making muscle: skeletal myogenesis in vivo and in vitro. *Development*  
148 **144**, 2104-2122 (2017).
- 149 14. Fanzani, A. et al. Hypertrophy and atrophy inversely regulate Caveolin-3 expression in myoblasts.  
150 *Biochem Biophys Res Commun* **357**, 314-318 (2007).
- 151 15. Korhonen, E. A. et al. Tie1 controls angiopoietin function in vascular remodeling and  
152 inflammation. *J Clin Invest* **126**, 3495-3510 (2016).
- 153 16. Fina, L. et al. Expression of the CD34 gene in vascular endothelial cells. *Blood* **75**, 2417-2426  
154 (1990).
- 155 17. Feng, W., Chen, L., Nguyen, P. K., Wu, S. M. & Li, G. Single Cell Analysis of Endothelial Cells  
156 Identified Organ-Specific Molecular Signatures and Heart-Specific Cell Populations and Molecular  
157 Features. *Front Cardiovasc Med* **6**, 165 (2019).

158

159
